# Supplementary material for: Effects of Glucagon-Like Peptide-1 Receptor Agonists on Weight Loss in Patients with Type 2 Diabetes: A Systematic Review and Network Meta-Analysis
Source: Hindawi journal article supplement (doi:10.1155/2015/157201), 2015-01-01
Supplement: f1 [file 157201.f1.pdf]

```

model {
  for (i in 1:ns) {
    # Likelihood for each arm
    for (k in 1:na[i]) {
      m[i, k] ~ dnorm(theta[i, k], prec[i, k])
      theta[i, k] <- mu[i] + delta[i, k]
      prec[i, k] <- pow(e[i, k], -2)
    }

    # Study-level relative effects
    # The arms are given in the order (arm_1, arm_2, ..., arm_{n_a-1}, arm_{n_a}).
    # The relative effects are parameterized as d[arm_1, arm_k].
    w[i, 1] <- 0
    delta[i, 1] <- 0
    for (k in 2:na[i]) { # parameterize multi-arm trials using a trick to avoid dnorm
      delta[i, k] ~ dnorm(md[i, k], taud[i, k])
      md[i, k] <- d[t[i, 1], t[i, k]] + sw[i, k]
      taud[i, k] <- tau.d * 2 * (k - 1) / k
      w[i, k] <- delta[i, k] - d[t[i, 1], t[i, k]]
      sw[i, k] <- sum(w[i, 1:k-1]) / (k - 1)
    }
  }

  # Relative effect matrix
  d[1,1] <- 0
  d[1,2] <- d.EX10BID.EX2QW
  d[1,3] <- d.EX10BID.Exe5ug
  d[1,4] <- d.EX10BID.Insulin
  d[1,5] <- d.EX10BID.SU + d.SU.LIR06
  d[1,6] <- d.EX10BID.SU + d.SU.LIR09
  d[1,7] <- d.EX10BID.SU + d.SU.LIR12
  d[1,8] <- d.EX10BID.LIR18
  d[1,9] <- d.EX10BID.Met
  d[1,10] <- d.EX10BID.SU
  d[1,11] <- d.EX10BID.Sitagliptin
  d[1,12] <- d.EX10BID.TZD
  d[1,13] <- d.EX10BID.placebo
  d[2,1] <- -d.EX10BID.EX2QW
  d[2,2] <- 0
  d[2,3] <- -d.EX10BID.EX2QW + d.EX10BID.Exe5ug
  d[2,4] <- -d.EX10BID.EX2QW + d.EX10BID.Insulin
  d[2,5] <- -d.EX10BID.EX2QW + d.EX10BID.SU + d.SU.LIR06
  d[2,6] <- -d.EX10BID.EX2QW + d.EX10BID.SU + d.SU.LIR09
  d[2,7] <- -d.EX10BID.EX2QW + d.EX10BID.SU + d.SU.LIR12

```

d[2,8] <- -d.EX10BID.EX2QW + d.EX10BID.LIR18  
d[2,9] <- -d.EX10BID.EX2QW + d.EX10BID.Met  
d[2,10] <- -d.EX10BID.EX2QW + d.EX10BID.SU  
d[2,11] <- -d.EX10BID.EX2QW + d.EX10BID.Sitagliptin  
d[2,12] <- -d.EX10BID.EX2QW + d.EX10BID.TZD  
d[2,13] <- -d.EX10BID.EX2QW + d.EX10BID.placebo  
d[3,1] <- -d.EX10BID.Exe5ug  
d[3,2] <- d.EX10BID.EX2QW + -d.EX10BID.Exe5ug  
d[3,3] <- 0  
d[3,4] <- -d.EX10BID.Exe5ug + d.EX10BID.Insulin  
d[3,5] <- -d.EX10BID.Exe5ug + d.EX10BID.SU + d.SU.LIR06  
d[3,6] <- -d.EX10BID.Exe5ug + d.EX10BID.SU + d.SU.LIR09  
d[3,7] <- -d.EX10BID.Exe5ug + d.EX10BID.SU + d.SU.LIR12  
d[3,8] <- -d.EX10BID.Exe5ug + d.EX10BID.LIR18  
d[3,9] <- -d.EX10BID.Exe5ug + d.EX10BID.Met  
d[3,10] <- -d.EX10BID.Exe5ug + d.EX10BID.SU  
d[3,11] <- -d.EX10BID.Exe5ug + d.EX10BID.Sitagliptin  
d[3,12] <- -d.EX10BID.Exe5ug + d.EX10BID.TZD  
d[3,13] <- -d.EX10BID.Exe5ug + d.EX10BID.placebo  
d[4,1] <- -d.EX10BID.Insulin  
d[4,2] <- d.EX10BID.EX2QW + -d.EX10BID.Insulin  
d[4,3] <- d.EX10BID.Exe5ug + -d.EX10BID.Insulin  
d[4,4] <- 0  
d[4,5] <- -d.EX10BID.Insulin + d.EX10BID.SU + d.SU.LIR06  
d[4,6] <- -d.EX10BID.Insulin + d.EX10BID.SU + d.SU.LIR09  
d[4,7] <- -d.EX10BID.Insulin + d.EX10BID.SU + d.SU.LIR12  
d[4,8] <- -d.EX10BID.Insulin + d.EX10BID.LIR18  
d[4,9] <- -d.EX10BID.Insulin + d.EX10BID.Met  
d[4,10] <- -d.EX10BID.Insulin + d.EX10BID.SU  
d[4,11] <- -d.EX10BID.Insulin + d.EX10BID.Sitagliptin  
d[4,12] <- -d.EX10BID.Insulin + d.EX10BID.TZD  
d[4,13] <- -d.EX10BID.Insulin + d.EX10BID.placebo  
d[5,1] <- -d.EX10BID.SU + -d.SU.LIR06  
d[5,2] <- d.EX10BID.EX2QW + -d.EX10BID.SU + -d.SU.LIR06  
d[5,3] <- d.EX10BID.Exe5ug + -d.EX10BID.SU + -d.SU.LIR06  
d[5,4] <- d.EX10BID.Insulin + -d.EX10BID.SU + -d.SU.LIR06  
d[5,5] <- 0  
d[5,6] <- -d.SU.LIR06 + d.SU.LIR09  
d[5,7] <- -d.SU.LIR06 + d.SU.LIR12  
d[5,8] <- d.EX10BID.LIR18 + -d.EX10BID.SU + -d.SU.LIR06  
d[5,9] <- d.EX10BID.Met + -d.EX10BID.SU + -d.SU.LIR06  
d[5,10] <- -d.SU.LIR06  
d[5,11] <- -d.EX10BID.SU + d.EX10BID.Sitagliptin + -d.SU.LIR06  
d[5,12] <- -d.EX10BID.SU + d.EX10BID.TZD + -d.SU.LIR06

d[5,13] <- -d.EX10BID.SU + d.EX10BID.placebo + -d.SU.LIR06  
d[6,1] <- -d.EX10BID.SU + -d.SU.LIR09  
d[6,2] <- d.EX10BID.EX2QW + -d.EX10BID.SU + -d.SU.LIR09  
d[6,3] <- d.EX10BID.Exe5ug + -d.EX10BID.SU + -d.SU.LIR09  
d[6,4] <- d.EX10BID.Insulin + -d.EX10BID.SU + -d.SU.LIR09  
d[6,5] <- d.SU.LIR06 + -d.SU.LIR09  
d[6,6] <- 0  
d[6,7] <- -d.SU.LIR09 + d.SU.LIR12  
d[6,8] <- d.EX10BID.LIR18 + -d.EX10BID.SU + -d.SU.LIR09  
d[6,9] <- d.EX10BID.Met + -d.EX10BID.SU + -d.SU.LIR09  
d[6,10] <- -d.SU.LIR09  
d[6,11] <- -d.EX10BID.SU + d.EX10BID.Sitagliptin + -d.SU.LIR09  
d[6,12] <- -d.EX10BID.SU + d.EX10BID.TZD + -d.SU.LIR09  
d[6,13] <- -d.EX10BID.SU + d.EX10BID.placebo + -d.SU.LIR09  
d[7,1] <- -d.EX10BID.SU + -d.SU.LIR12  
d[7,2] <- d.EX10BID.EX2QW + -d.EX10BID.SU + -d.SU.LIR12  
d[7,3] <- d.EX10BID.Exe5ug + -d.EX10BID.SU + -d.SU.LIR12  
d[7,4] <- d.EX10BID.Insulin + -d.EX10BID.SU + -d.SU.LIR12  
d[7,5] <- d.SU.LIR06 + -d.SU.LIR12  
d[7,6] <- d.SU.LIR09 + -d.SU.LIR12  
d[7,7] <- 0  
d[7,8] <- d.EX10BID.LIR18 + -d.EX10BID.SU + -d.SU.LIR12  
d[7,9] <- d.EX10BID.Met + -d.EX10BID.SU + -d.SU.LIR12  
d[7,10] <- -d.SU.LIR12  
d[7,11] <- -d.EX10BID.SU + d.EX10BID.Sitagliptin + -d.SU.LIR12  
d[7,12] <- -d.EX10BID.SU + d.EX10BID.TZD + -d.SU.LIR12  
d[7,13] <- -d.EX10BID.SU + d.EX10BID.placebo + -d.SU.LIR12  
d[8,1] <- -d.EX10BID.LIR18  
d[8,2] <- d.EX10BID.EX2QW + -d.EX10BID.LIR18  
d[8,3] <- d.EX10BID.Exe5ug + -d.EX10BID.LIR18  
d[8,4] <- d.EX10BID.Insulin + -d.EX10BID.LIR18  
d[8,5] <- -d.EX10BID.LIR18 + d.EX10BID.SU + d.SU.LIR06  
d[8,6] <- -d.EX10BID.LIR18 + d.EX10BID.SU + d.SU.LIR09  
d[8,7] <- -d.EX10BID.LIR18 + d.EX10BID.SU + d.SU.LIR12  
d[8,8] <- 0  
d[8,9] <- -d.EX10BID.LIR18 + d.EX10BID.Met  
d[8,10] <- -d.EX10BID.LIR18 + d.EX10BID.SU  
d[8,11] <- -d.EX10BID.LIR18 + d.EX10BID.Sitagliptin  
d[8,12] <- -d.EX10BID.LIR18 + d.EX10BID.TZD  
d[8,13] <- -d.EX10BID.LIR18 + d.EX10BID.placebo  
d[9,1] <- -d.EX10BID.Met  
d[9,2] <- d.EX10BID.EX2QW + -d.EX10BID.Met  
d[9,3] <- d.EX10BID.Exe5ug + -d.EX10BID.Met  
d[9,4] <- d.EX10BID.Insulin + -d.EX10BID.Met

d[9,5] <- -d.EX10BID.Met + d.EX10BID.SU + d.SU.LIR06  
d[9,6] <- -d.EX10BID.Met + d.EX10BID.SU + d.SU.LIR09  
d[9,7] <- -d.EX10BID.Met + d.EX10BID.SU + d.SU.LIR12  
d[9,8] <- d.EX10BID.LIR18 + -d.EX10BID.Met  
d[9,9] <- 0  
d[9,10] <- -d.EX10BID.Met + d.EX10BID.SU  
d[9,11] <- -d.EX10BID.Met + d.EX10BID.Sitagliptin  
d[9,12] <- -d.EX10BID.Met + d.EX10BID.TZD  
d[9,13] <- -d.EX10BID.Met + d.EX10BID.placebo  
d[10,1] <- -d.EX10BID.SU  
d[10,2] <- d.EX10BID.EX2QW + -d.EX10BID.SU  
d[10,3] <- d.EX10BID.Exe5ug + -d.EX10BID.SU  
d[10,4] <- d.EX10BID.Insulin + -d.EX10BID.SU  
d[10,5] <- d.SU.LIR06  
d[10,6] <- d.SU.LIR09  
d[10,7] <- d.SU.LIR12  
d[10,8] <- d.EX10BID.LIR18 + -d.EX10BID.SU  
d[10,9] <- d.EX10BID.Met + -d.EX10BID.SU  
d[10,10] <- 0  
d[10,11] <- -d.EX10BID.SU + d.EX10BID.Sitagliptin  
d[10,12] <- -d.EX10BID.SU + d.EX10BID.TZD  
d[10,13] <- -d.EX10BID.SU + d.EX10BID.placebo  
d[11,1] <- -d.EX10BID.Sitagliptin  
d[11,2] <- d.EX10BID.EX2QW + -d.EX10BID.Sitagliptin  
d[11,3] <- d.EX10BID.Exe5ug + -d.EX10BID.Sitagliptin  
d[11,4] <- d.EX10BID.Insulin + -d.EX10BID.Sitagliptin  
d[11,5] <- d.EX10BID.SU + -d.EX10BID.Sitagliptin + d.SU.LIR06  
d[11,6] <- d.EX10BID.SU + -d.EX10BID.Sitagliptin + d.SU.LIR09  
d[11,7] <- d.EX10BID.SU + -d.EX10BID.Sitagliptin + d.SU.LIR12  
d[11,8] <- d.EX10BID.LIR18 + -d.EX10BID.Sitagliptin  
d[11,9] <- d.EX10BID.Met + -d.EX10BID.Sitagliptin  
d[11,10] <- d.EX10BID.SU + -d.EX10BID.Sitagliptin  
d[11,11] <- 0  
d[11,12] <- -d.EX10BID.Sitagliptin + d.EX10BID.TZD  
d[11,13] <- -d.EX10BID.Sitagliptin + d.EX10BID.placebo  
d[12,1] <- -d.EX10BID.TZD  
d[12,2] <- d.EX10BID.EX2QW + -d.EX10BID.TZD  
d[12,3] <- d.EX10BID.Exe5ug + -d.EX10BID.TZD  
d[12,4] <- d.EX10BID.Insulin + -d.EX10BID.TZD  
d[12,5] <- d.EX10BID.SU + -d.EX10BID.TZD + d.SU.LIR06  
d[12,6] <- d.EX10BID.SU + -d.EX10BID.TZD + d.SU.LIR09  
d[12,7] <- d.EX10BID.SU + -d.EX10BID.TZD + d.SU.LIR12  
d[12,8] <- d.EX10BID.LIR18 + -d.EX10BID.TZD  
d[12,9] <- d.EX10BID.Met + -d.EX10BID.TZD

```

d[12,10] <- d.EX10BID.SU + -d.EX10BID.TZD
d[12,11] <- d.EX10BID.Sitagliptin + -d.EX10BID.TZD
d[12,12] <- 0
d[12,13] <- -d.EX10BID.TZD + d.EX10BID.placebo
d[13,1] <- -d.EX10BID.placebo
d[13,2] <- d.EX10BID.EX2QW + -d.EX10BID.placebo
d[13,3] <- d.EX10BID.Exe5ug + -d.EX10BID.placebo
d[13,4] <- d.EX10BID.Insulin + -d.EX10BID.placebo
d[13,5] <- d.EX10BID.SU + -d.EX10BID.placebo + d.SU.LIR06
d[13,6] <- d.EX10BID.SU + -d.EX10BID.placebo + d.SU.LIR09
d[13,7] <- d.EX10BID.SU + -d.EX10BID.placebo + d.SU.LIR12
d[13,8] <- d.EX10BID.LIR18 + -d.EX10BID.placebo
d[13,9] <- d.EX10BID.Met + -d.EX10BID.placebo
d[13,10] <- d.EX10BID.SU + -d.EX10BID.placebo
d[13,11] <- d.EX10BID.Sitagliptin + -d.EX10BID.placebo
d[13,12] <- d.EX10BID.TZD + -d.EX10BID.placebo
d[13,13] <- 0

# Study baseline priors
for (i in 1:ns) {
  mu[i] ~ dnorm(0, 2.938E-5)
}

# Variance prior
sd.d ~ dunif(0, 1.23E1)
tau.d <- pow(sd.d, -2)

# Effect parameter priors
d.EX10BID.EX2QW ~ dnorm(0, 2.938E-5)
d.EX10BID.Exe5ug ~ dnorm(0, 2.938E-5)
d.EX10BID.Insulin ~ dnorm(0, 2.938E-5)
d.EX10BID.LIR18 ~ dnorm(0, 2.938E-5)
d.EX10BID.Met ~ dnorm(0, 2.938E-5)
d.EX10BID.SU ~ dnorm(0, 2.938E-5)
d.EX10BID.Sitagliptin ~ dnorm(0, 2.938E-5)
d.EX10BID.TZD ~ dnorm(0, 2.938E-5)
d.EX10BID.placebo ~ dnorm(0, 2.938E-5)
d.SU.LIR06 ~ dnorm(0, 2.938E-5)
d.SU.LIR09 ~ dnorm(0, 2.938E-5)
d.SU.LIR12 ~ dnorm(0, 2.938E-5)
}

list(
ns = 51,

```

na = c(2, 3, 2, 2, 2, 3, 2, 2, 3, 2, 4, 2, 2, 2, 2, 3, 2, 2, 2, 2, 2, 2, 2, 2, 2, 2, 2, 2, 3, 3, 3, 3, 2, 5, 5, 3, 3, 3, 2, 2, 3, 3, 2, 2, 3, 3, 2, 4, 2, 2),

t = structure(.Data = c(1, 13, NA, NA, NA, 1, 11, 13, NA, NA, 1, 4, NA, NA, NA, 1, 4, NA, NA, NA, 1, 4, NA, NA, NA, 1, 3, 13, NA, NA, 1, 13, NA, NA, NA, 1, 2, NA, NA, NA, 2, 11, 12, NA, NA, 2, 4, NA, NA, NA, 2, 9, 11, 12, NA, 2, 8, NA, NA, NA, 2, 4, NA, NA, NA, 1, 4, NA, NA, NA, 1, 4, NA, NA, NA, 1, 3, 13, NA, NA, 1, 12, NA, NA, NA, 1, 10, NA, NA, NA, 1, 10, NA, NA, NA, 1, 13, NA, NA, NA, 8, 13, NA, NA, NA, 1, 4, NA, NA, NA, 1, 10, NA, NA, NA, 1, 13, NA, NA, NA, 5, 13, NA, NA, NA, 1, 4, NA, NA, NA, 2, 4, NA, NA, NA, 2, 13, NA, NA, NA, 1, 2, NA, NA, NA, 1, 3, 13, NA, NA, 1, 3, 13, NA, NA, 5, 6, 13, NA, NA, 1, 3, 13, NA, NA, 2, 13, NA, NA, NA, 5, 7, 8, 12, 13, 10, 5, 7, 8, 13, 10, 7, 8, NA, NA, 7, 8, 13, NA, NA, 4, 8, 13, NA, NA, 1, 8, NA, NA, NA, 1, 13, NA, NA, NA, 1, 3, 13, NA, NA, 10, 8, 13, NA, NA, 1, 13, NA, NA, NA, 1, 4, NA, NA, NA, 7, 8, 11, NA, NA, 5, 6, 13, NA, NA, 10, 6, NA, NA, NA, 10, 5, 7, 8, NA, 1, 9, NA, NA, NA, 1, 13, NA, NA, NA), .Dim = c(51, 5)),

m = structure(.Data = c(-6.16, -3.97, NA, NA, NA, -0.9, 0.1, 0.4, NA, NA, -1.6, 0.6, NA, NA, NA, -1.9, 4.1, NA, NA, NA, -3.6, 1.0, NA, NA, NA, -1.6, -0.9, -0.6, NA, NA, -1.78, 0.96, NA, NA, NA, -3.6, -3.7, NA, NA, NA, -2.3, -0.8, 2.8, NA, NA, -2.1, 2.4, NA, NA, NA, -2.0, -2.0, -0.8, 1.5, NA, -2.68, -3.57, NA, NA, NA, -2.79, 0.88, NA, NA, NA, -2.73, 2.98, NA, NA, NA, -4.2, 0.5, NA, NA, NA, -2.8, -1.6, -0.3, NA, NA, -2.82, 1.48, NA, NA, NA, -8.0, 4.3, NA, NA, NA, -5.1, -0.9, NA, NA, NA, -6.4, -2.3, NA, NA, NA, -3.5, -0.2, NA, NA, NA, -4.1, 1.02, NA, NA, NA, -3.92, 1.47, NA, NA, NA, -1.2, -0.1, NA, NA, NA, -0.7, -0.9, NA, NA, NA, -2.3, 1.8, NA, NA, NA, -1.67, -0.34, NA, NA, NA, -0.8, -1.6, NA, NA, NA, -2.45, -1.63, NA, NA, NA, -1.3, -0.2, -0.7, NA, NA, -1.54, -0.39, -0.47, NA, NA, -0.44, -1.37, -1.87, NA, NA, -1.6, -1.6, -0.9, NA, NA, -3.8, -0.04, NA, NA, NA, 0.7, 0.3, -0.2, 2.1, -0.1, 0.7, -2.07, -3.03, -2.91, -1.8, 0.95, -1.89, -2.7, NA, NA, -1.0, -2.0, 0.6, NA, NA, 1.6, -1.8, -0.42, NA, NA, -2.87, -3.24, NA, NA, NA, -2.1, -1.4, NA, NA, NA, -3.1, -2.8, -1.4, NA, NA, 1.038, -1.821, -0.293, NA, NA, -2.54, -0.33, NA, NA, NA, -2.5, 2.9, NA, NA, NA, -2.78, -3.68, -1.16, NA, NA, -0.1, -0.48, -0.95, NA, NA, 1.21, -0.9, NA, NA, NA, 0.1, -1.8, -2.3, -2.4, NA, -5.8, -3.81, NA, NA, NA, -1.75, -0.24, NA, NA, NA), .Dim = c(51, 5)),

e = structure(.Data = c(0.5402433314191458, 0.5197234841721124, NA, NA, NA, 0.425, 0.4, 0.375, NA, NA, 0.29964229882707955, 0.29964229882707955, NA, NA, NA, 0.3412500738508723, 0.4849343154722923, NA, NA, NA, 0.6, 0.80075721739621, NA, NA, NA, 0.30023375905703775, 0.2996331089849718, 0.30025598834425493, NA, NA, 0.35028663966387197, 0.36033226924922374, NA, NA, NA, 0.5031195202938167, 0.5014169112813397, NA, NA, NA, 0.3059503636212907, 0.3314162744766041, 0.30595008505547855, NA, NA, 0.01310243564160837, 0.01310243564160837, NA, NA, NA, 0.44894544894567345, 0.45076673613578017, 0.2999887523453877, 0.2999887523453877, NA, 0.18010173142800803, 0.1799504398550337, NA, NA, NA, 0.3470110468942836, 0.3505229329596172, NA, NA, NA, 0.31, 0.3098634935183308, NA, NA, NA, 0.5570860145311556, 0.425, NA, NA, NA, 0.5004635019800737, 0.4004542874831488, 0.3000899570143675, NA, NA, 0.5472430904086409, 0.5472430904086409, NA, NA, NA, 0.15622669317698865, 0.24371395369996807, NA, NA, NA, 0.18721131622601486, 0.22285714285714286, NA, NA, NA, 1.2152753540027508, 1.490312245214168, NA, NA, NA, 5.2001323243236985, 5.7606290774898055, NA, NA, NA, 0.22001506728916123, 0.2197226312469449, NA, NA, NA, 0.3352578676747763, 0.3188162183680864, NA, NA, NA, 0.14970198315548047, 0.12474111121673642, NA, NA, NA, 0.47571500071446343, 0.6985938257194472, NA, NA, NA, 0.20020353279963501, 0.19969592268862563, NA, NA, NA,

```

0.17021289582914118, 0.1703270992963744, NA, NA, NA, 0.5, 0.5059644256269407, NA, NA,
NA, 0.15971673037682732, 0.15985531484078935, NA, NA, NA, 0.2992061568957503,
0.2992061568957503, 0.1992234925906079, NA, NA, 0.26987908815286565,
0.28008047133374936, 0.3904612656845747, NA, NA, 1.8505822179666984,
1.8367241714035838, 2.0531228985045287, NA, NA, 0.19968855418425757,
0.19996836484498118, 0.19979341557439423, NA, NA, 1.3994379824296133,
0.7002244538105519, NA, NA, NA, 0.19653653462412551, 0.20000438591682163,
0.2000384578409477, 0.20024231011107688, 0.2697367137355279, 0.2897081318978874,
0.28027141508848613, 0.29032127148723724, 0.28085228911076227, 0.28,
0.29972029972044956, 0.30985513402497084, 0.32016662328647977, NA, NA,
0.29981267559834457, 0.29981267559834457, 0.29990676517312875, NA, NA,
0.3302356786422022, 0.3296902366978935, 0.3896196976179847, NA, NA,
0.330291750869804, 0.3301813781685309, NA, NA, NA, 0.3995955162118021,
0.49942374200079237, NA, NA, NA, 0.3000534140483178, 0.2997163160888478,
0.2997163160888478, NA, NA, 0.44141483756612604, 0.455, 0.4864154602806124, NA, NA,
0.5693793613601191, 0.720681495656589, NA, NA, NA, 0.19992488708089423,
0.20002520002530003, NA, NA, NA, 0.31030742445906545, 0.3096644249421725,
0.31030742445906545, NA, NA, 2.01991473967481, 2.3095768994656694, 2.27945264215471,
NA, NA, 1.6380707425431167, 1.1276239714086973, NA, NA, NA, 0.1447493728911492,
0.14601912855199384, 0.16, 0.17371980724307587, NA, 0.2889689088864584,
0.27064026649069395, NA, NA, NA, 0.2381818181818182, 0.24851164100356687, NA, NA,
NA), .Dim = c(51, 5))
)

```

```

list(
d.EX10BID.EX2QW = 0.8957255455674726,
d.EX10BID.Exe5ug = 0.4566936431170917,
d.EX10BID.Insulin = 2.5568246591804566,
d.EX10BID.LIR18 = -1.4349212241243023,
d.EX10BID.Met = 2.8322171292134874,
d.EX10BID.SU = 15.939635320893302,
d.EX10BID.Sitagliptin = 0.6609065074387261,
d.EX10BID.TZD = 5.246908996501909,
d.EX10BID.placebo = 1.1160183294916104,
d.SU.LIR06 = -0.6310215124302521,
d.SU.LIR09 = -2.7216762292091135,
d.SU.LIR12 = -5.358891905208765,
mu = c(-6.592355031788382, -1.5936212932280829, -0.8887562006414326,
-3.07742897571942, -3.9382627376964843, -1.859508024914645, -2.0287778992029737,
-3.029186253212147, -0.7074360520925238, -2.123055528763754, -1.4494121063974497,
-2.4590951452841527, -3.704508969847302, -1.9793292539813838, -4.309104774317473,
-3.511184711979647, -0.8716996902138328, -8.314731499135071, -4.488120102120745,
-4.758467164949556, 7.043630261199388, -3.7395985344990885, -2.208152366349621,
-1.0324256589050036, 1.6144574804407366, -2.3351038707397556, -2.0044908423628875,

```

```
0.9094015797768922, -3.2537038868569486, -1.8946363763965044, -2.450870101833355,
-0.4166629129104134, -2.131476593245068, -4.4412217507973955, 0.9059500821957938,
0.5883828247086859, 1.7685304142918705, -0.9614289495575915, 0.8707348175340992,
-3.3262757135819294, -2.657202963142497, -3.102886065261921, 0.9038106681075522,
-2.695295267899678, -2.35232048442234, -1.432806031613623, -3.7195415858942114,
0.9415611392094134, -0.28134359333658676, -6.270177052399954, -2.2018823076663225),
delta = structure(.Data = c(NA, 5.974046286972138, NA, NA, NA, NA, -0.43140335495599635,
3.5222373605564297, NA, NA, NA, 2.3250672244147, NA, NA, NA, NA, 7.034702463883187, NA,
NA, NA, NA, 4.508817645162357, NA, NA, NA, NA, -0.37380083248883256, 1.138803176910114,
NA, NA, NA, 1.2905387049526664, NA, NA, NA, NA, -1.0008723170693774, NA, NA, NA, NA,
0.7462104420134413, 4.815387358942273, NA, NA, NA, 4.589574516371187, NA, NA, NA, NA,
1.2789893504197, 2.1736344924629063, 3.303338368406676, NA, NA, -0.35288677305178395,
NA, NA, NA, NA, 2.1235933702059864, NA, NA, NA, NA, 7.10238276328593, NA, NA, NA, NA,
4.444142509821387, NA, NA, NA, NA, 2.1720192599074477, 3.812265201026783, NA, NA, NA,
2.4933878498051394, NA, NA, NA, NA, 12.850019159166807, NA, NA, NA, NA,
4.971592911280548, NA, NA, NA, NA, 3.9680611082585826, NA, NA, NA, NA,
-1.8129264132284097, NA, NA, NA, NA, 4.467286155258912, NA, NA, NA, NA,
5.42357572463013, NA, NA, NA, NA, 1.1475586484652656, NA, NA, NA, NA,
2.090727858125325, NA, NA, NA, NA, 4.065055866203564, NA, NA, NA, NA,
0.41986886882962116, NA, NA, NA, NA, -1.0463403782784744, NA, NA, NA, NA,
0.32052528959738164, NA, NA, NA, NA, 1.5267068403889468, -0.3663832695173306, NA, NA,
NA, 2.366238719056464, -0.4154991408867281, NA, NA, NA, -3.2210845781410304,
-3.062517238258335, NA, NA, NA, 0.417080239262147, 1.7340902613216644, NA, NA, NA,
5.60542715733249, NA, NA, NA, NA, -0.6947031543116333, -1.2793917584852608,
2.0017109141867775, -0.9452102442477434, NA, -3.2671433328744763, -3.1684346328208446,
-3.75231063105181, -1.5772255316517874, NA, -3.0768227602827434, -4.406944301915749,
NA, NA, NA, -3.1892415391059354, 4.074022452729643, NA, NA, NA, -3.183607152034051,
-2.053944577085453, NA, NA, NA, -0.9232742803334055, NA, NA, NA, NA, 2.996012729204016,
NA, NA, NA, NA, 1.782780799565401, 1.8746863192800436, NA, NA, NA, -4.7415427765758835,
-2.4427558315842726, NA, NA, NA, NA, -0.47172188408558613, NA, NA, NA, NA,
6.831275572249652, NA, NA, NA, NA, -0.04660997987276372, 0.27287396614809434, NA, NA,
NA, 2.637900206720261, 0.0808645297814139, NA, NA, NA, 0.5322010424629218, NA, NA, NA,
NA, -1.8909822308236661, -2.441860584598912, -3.0146750817824755, NA, NA,
1.4061196406765075, NA, NA, NA, NA, 1.8698599129299833, NA, NA, NA), .Dim = c(51, 5)),
sd.d = 10.428131099744308
)
```

```
list(
d.EX10BID.EX2QW = 0.09744517865831037,
d.EX10BID.Exe5ug = 0.7983981729310514,
d.EX10BID.Insulin = 4.305688424513304,
d.EX10BID.LIR18 = -1.383034021875909,
d.EX10BID.Met = 2.085768806501968,
d.EX10BID.SU = -5.678680258255404,
```



d.EX10BID.Sitagliptin = 1.7972855302803126,  
d.EX10BID.TZD = 5.87486474238661,  
d.EX10BID.placebo = 1.2797149494081057,  
d.SU.LIR06 = -1.1709950115421972,  
d.SU.LIR09 = -5.944330524940246,  
d.SU.LIR12 = -2.7317490999450103,  
mu = c(-5.688057175038192, -2.277691467473313, -2.050512150948088,  
-2.1614680258886585, -2.1864688179033713, -1.5333681169578004, -0.9856526020583781,  
-4.666305703251879, -2.3770224668455593, -2.0674761383467573, -2.2247072744293543,  
-2.4221325585590807, -2.6149857339819262, -2.210749798703347, -4.759043438179661,  
-2.9474457005063504, -3.0450201015106937, -7.969903114193894, -5.255837030911234,  
-9.902111479942226, -0.5183144744236641, -3.95854791050871, -6.30118680935726,  
-1.5980344731441227, -0.9398021969825163, -0.8925688109056849, -2.535182663172589,  
-3.0564820738486924, -2.4134918449854417, 0.07436049059740846, -0.6308248287487918,  
-12.11007529451518, -2.1671069430049785, -6.530072022422267, 0.0292655549167975,  
1.5091730680595998, 1.0247476854661062, -1.4840321592518053, 1.3855177583924103,  
-3.478519467584607, -2.0383920073286284, -3.129650856217219, 1.1611847504449626,  
-1.778100228781819, -2.1712190941224923, -3.273369909682191, -5.507412044168503,  
-0.4481437963792916, -0.5024688564062397, -6.802495534449828, -2.4306152089344835),  
delta = structure(.Data = c(NA, 2.619606778397892, NA, NA, NA, NA, 0.7744221947372834,  
4.818656611488761, NA, NA, NA, 2.314104738969365, NA, NA, NA, NA, 4.230430756087413,  
NA, NA, NA, NA, 3.9631382376311564, NA, NA, NA, NA, 0.10340684317788729,  
0.8309043888598031, NA, NA, NA, 2.4670576241599553, NA, NA, NA, NA,  
-1.1183803987291088, NA, NA, NA, NA, 4.021626273346377, 4.861004920462494, NA, NA, NA,  
4.47774465468012, NA, NA, NA, NA, -1.4822993399863398, 1.2287640914881106,  
4.009581213308806, NA, NA, -0.5667449179968562, NA, NA, NA, NA, 3.8769506398719766, NA,  
NA, NA, NA, 6.557107491858457, NA, NA, NA, NA, -0.4090817387829846, NA, NA, NA, NA,  
0.40459803590095245, 3.786655430993033, NA, NA, NA, 6.446144842076464, NA, NA, NA, NA,  
12.440072073410263, NA, NA, NA, NA, 2.972601231397289, NA, NA, NA, NA,  
0.8411118822718477, NA, NA, NA, NA, 22.73405866725939, NA, NA, NA, NA,  
5.669204691131996, NA, NA, NA, NA, 3.0538247800818787, NA, NA, NA, NA,  
0.5595780599073762, NA, NA, NA, NA, 0.7351087031086919, NA, NA, NA, NA,  
3.5535254928801034, NA, NA, NA, NA, 1.4551482309367794, NA, NA, NA, NA,  
-1.8546955321628238, NA, NA, NA, NA, 1.1103679769125623, NA, NA, NA, NA,  
1.1243208042220605, 0.8886960638517654, NA, NA, NA, 1.1704782869588939,  
-0.2732695682384423, NA, NA, NA, -5.2278313152858775, -4.570362415238386, NA, NA, NA,  
0.5630757383518895, 1.0006241700451697, NA, NA, NA, 4.122517987542122, NA, NA, NA, NA,  
-0.12513959334269853, -1.3311643405882503, 1.0578454661138423, -0.21004427562716044,  
NA, -2.5232930044954025, -3.173887303227459, -3.9125920147465307, -2.6139135431088816,  
NA, -4.001000550690312, -3.9227172519334603, NA, NA, NA, -0.6167576245536813,  
1.9225433836557082, NA, NA, NA, -4.596778040074198, -5.607069015469298, NA, NA, NA,  
-1.0493445378348683, NA, NA, NA, NA, -1.5749722529453734, NA, NA, NA, NA,  
0.6523239727088999, 2.0567423069103095, NA, NA, NA, -3.509270508171897,  
-1.3516965093329671, NA, NA, NA, 3.4100314512733876, NA, NA, NA, NA, 5.661709570086349,

```
NA, NA, NA, NA, -0.9101472379858135, 2.914764501376232, NA, NA, NA,
-1.4955232622785628, 0.5163632710044764, NA, NA, NA, -4.638469129464038, NA, NA, NA,
NA, -1.3155096047006314, -1.023906735082899, -2.487899160959333, NA, NA,
3.195054747910441, NA, NA, NA, NA, -0.5169248288562442, NA, NA, NA), .Dim = c(51, 5)),
sd.d = 7.484189469381685
)
```

```
list(
d.EX10BID.EX2QW = 1.1637341602057858,
d.EX10BID.Exe5ug = 0.8257901282731981,
d.EX10BID.Insulin = 2.692818787871214,
d.EX10BID.LIR18 = -0.3254700972810159,
d.EX10BID.Met = 2.384005879096936,
d.EX10BID.SU = 3.807596308470061,
d.EX10BID.Sitagliptin = -0.4042698237002247,
d.EX10BID.TZD = 9.347542529388628,
d.EX10BID.placebo = 1.9540034845650103,
d.SU.LIR06 = -2.4871762824322183,
d.SU.LIR09 = 7.006729968492676,
d.SU.LIR12 = -3.8938560393967503,
mu = c(-5.791305488397549, -1.4075301181615507, -1.013926146128699,
-1.8954097982385671, -3.560492637242136, -0.9186764313663023, -0.7942889395334382,
-2.161873452159309, -2.467688177113445, -2.168457373097732, -2.1119738850458347,
-2.7801109696756545, -3.1055071758019954, -3.986212460753312, -3.19778953877456,
-2.8376784505515698, -5.653130760146789, -7.467423437283165, -4.823436372126387,
-4.2172006377448605, 6.913880168754146, -4.10868964114692, -4.153244911843388,
-0.9661476103824551, -1.9830154148591888, -1.47449621813236, -1.7101197685674001,
-0.19336992171787248, -2.143080383039722, -1.5391684909333891, -1.7084983402196219,
1.9555698256585878, -0.9824676786051804, -5.694571563871649, 0.8132146103928372,
0.034367149612613224, 0.8163099153822178, -1.3806586283649251, 1.0757939510999337,
-3.880915516343329, -2.8503433961314064, -2.902247324233816, -0.21467680887654228,
-5.123425055507345, -1.8674972519176452, -3.670138296001716, -7.094129693239151,
2.5393775987911464, 1.27355299993328, -6.993964663172424, -1.998755704348719),
delta = structure(.Data = c(NA, 4.1059867865027195, NA, NA, NA, NA, 1.7778459270512115,
0.4022568905641323, NA, NA, NA, 2.9939585561509876, NA, NA, NA, NA, 6.2582237955380355,
NA, NA, NA, NA, 6.307563623363495, NA, NA, NA, NA, 0.42273838670601355,
-0.9230464855256786, NA, NA, NA, 2.7519835818601335, NA, NA, NA, NA,
-0.9477524757005501, NA, NA, NA, NA, 3.434344367843626, 4.281188906414832, NA, NA, NA,
4.501638123125113, NA, NA, NA, NA, 1.8008500538750651, 0.4141147873936315,
0.53478497151408, NA, NA, -1.2564635202285148, NA, NA, NA, NA, 1.7221926306703124, NA,
NA, NA, NA, 5.017830292046046, NA, NA, NA, NA, 5.518299997850061, NA, NA, NA, NA,
0.8804107466545704, 0.10049988408294919, NA, NA, NA, 4.104945940712926, NA, NA, NA, NA,
11.352734529796884, NA, NA, NA, NA, 4.735622183615793, NA, NA, NA, NA,
8.349397208069606, NA, NA, NA, NA, 32.609145997832066, NA, NA, NA, NA,
```

5.1721902667765125, NA, NA, NA, NA, 6.957507498528236, NA, NA, NA, NA,  
1.3423513419770192, NA, NA, NA, NA, 1.4937088354419346, NA, NA, NA, NA,  
3.348937415429946, NA, NA, NA, NA, 0.7373976447458276, NA, NA, NA, NA,  
1.2016204474964265, NA, NA, NA, NA, 0.8485582629775772, NA, NA, NA, NA,  
0.6006277863647217, 1.611724097734392, NA, NA, NA, 1.1497369018043115,  
2.0246007861722175, NA, NA, NA, -0.6523336500749328, 0.27936681420073883, NA, NA, NA,  
1.0137437631174868, 0.7784655513824699, NA, NA, NA, 5.162625032136913, NA, NA, NA, NA,  
-0.19718756467884868, 0.23222485150258199, 0.753365682174931, -0.8574516338908733,  
NA, -1.9083179379528676, -3.675545988647708, -3.9131792171684947, -2.046981240729136,  
NA, -3.8496570863374076, -3.744481545627679, NA, NA, NA, -0.23514629857518576,  
2.7817166543879983, NA, NA, NA, -3.7810249011125925, -0.5731527274012327, NA, NA, NA,  
-0.30572983690991323, NA, NA, NA, NA, -0.03737953242524772, NA, NA, NA, NA,  
0.75116745810341, 1.80784993307773, NA, NA, NA, -0.06097742418473029,  
-1.1456040964733532, NA, NA, NA, 0.6525919935657694, NA, NA, NA, NA, 6.03963940379872,  
NA, NA, NA, NA, -1.8229506774258257, 1.893091127640843, NA, NA, NA, -8.665442361775323,  
-0.45113429403826555, NA, NA, NA, -9.397201329024565, NA, NA, NA, NA,  
-1.505439325155451, -2.4162078764943153, -3.3402839651745824, NA, NA,  
1.8826460990773513, NA, NA, NA, NA, 0.8316166770912887, NA, NA, NA), .Dim = c(51, 5)),  
sd.d = 2.021925645136791  
)

list(  
d.EX10BID.EX2QW = 1.3375870476901888,  
d.EX10BID.Exe5ug = -0.20106664910581173,  
d.EX10BID.Insulin = 6.480629092593263,  
d.EX10BID.LIR18 = 1.0409630874546978,  
d.EX10BID.Met = 2.83710364794395,  
d.EX10BID.SU = 5.030565458645571,  
d.EX10BID.Sitagliptin = 2.5136443289397508,  
d.EX10BID.TZD = 5.302844828836797,  
d.EX10BID.placebo = 1.3342081052105108,  
d.SU.LIR06 = -0.6170229615348719,  
d.SU.LIR09 = 2.2763682578371296,  
d.SU.LIR12 = -3.7916036121546104,  
mu = c(-7.429665694858892, -2.9006139120851873, -1.13844145524712, -2.038451687037297,  
-2.416041789286858, -1.0587971943713503, -0.9672025403238612, -5.373447115650487,  
-1.6703300070383857, -2.075737694078856, -1.7423793057395858, -2.6193938281257534,  
-2.6599089938793883, -1.7520719179129578, -3.884022410303156, -1.6208270194187882,  
-1.1200594814519147, -8.298105032746736, -5.427397816762944, -4.671135940834692,  
8.764588358571094, -4.398469069471638, -2.466059702240992, -1.075516755273885,  
-0.7369858841258182, -1.5733985294384851, -1.9377393396394778, 1.230740073946463,  
-2.631301141096952, -0.7363540100137769, -1.10234429793186, -1.4296377793660642,  
-1.966530690521698, -5.835401666878827, 0.6028237084350838, 0.31744002855388664,  
0.9725800332782532, -2.6680294529239315, 2.258095545787132, -3.4969228177537506,

```
-2.4723484002082095, -2.639395248095126, 1.6918345861816513, -3.256666600258299,  
-1.9322033960187737, -3.6589847099109516, 3.5620358894856237, 2.2147161751817017,  
0.2666717400434485, -5.312735388424251, -2.5920937113254743),  
delta = structure(.Data = c(NA, -0.62533017887452, NA, NA, NA, NA, -0.7411233827261985,  
0.13688309957660594, NA, NA, NA, 3.9160646407890107, NA, NA, NA, NA, 5.361135501869258,  
NA, NA, NA, NA, 8.101759950194824, NA, NA, NA, NA, -0.1323382494675046,  
1.3716270958759524, NA, NA, NA, 3.6555782901872673, NA, NA, NA, NA,  
-2.8471217191961906, NA, NA, NA, NA, 3.403981614183505, 4.709716759484515, NA, NA, NA,  
4.422570633980912, NA, NA, NA, NA, 0.3642655355381908, -0.03614789628840498,  
4.737237634536107, NA, NA, -1.5573511359295527, NA, NA, NA, NA, 4.339876556524576, NA,  
NA, NA, NA, 5.421440639439291, NA, NA, NA, NA, 4.928216315153906, NA, NA, NA, NA,  
-1.447417372802176, 3.840093410926224, NA, NA, NA, 3.4434271412144506, NA, NA, NA, NA,  
11.86126339192324, NA, NA, NA, NA, 3.973461904684532, NA, NA, NA, NA,  
-4.782552107542538, NA, NA, NA, NA, 29.768293605543032, NA, NA, NA, NA,  
5.12932857033138, NA, NA, NA, NA, 4.077242974990854, NA, NA, NA, NA, 1.063134967126403,  
NA, NA, NA, NA, -1.1582701846011492, NA, NA, NA, NA, 4.167126090357079, NA, NA, NA, NA,  
0.2150883171500242, NA, NA, NA, NA, -3.275823743347682, NA, NA, NA, NA,  
1.0863243890604932, NA, NA, NA, NA, 0.4053166822469264, 1.196880067552085, NA, NA, NA,  
1.6352306035286528, 1.791201395389736, NA, NA, NA, -5.6225549312700895,  
5.189198320028462, NA, NA, NA, -1.1477834714593134, 0.41946393693170064, NA, NA, NA,  
2.119084497883178, NA, NA, NA, NA, -0.7462881585185053, -2.3770225906530893,  
1.2880962716364606, -0.7685813423602407, NA, -3.538776658784631, -2.548361710339751,  
-2.6927902634150875, -2.9710154840438814, NA, -1.9137912250311273, -2.810238819026686,  
NA, NA, NA, 0.17642912367864994, 2.011932113455032, NA, NA, NA, -5.24593658365599,  
-2.9656126941060195, NA, NA, NA, 1.9392400451204383, NA, NA, NA, NA,  
1.5280073677239367, NA, NA, NA, NA, 0.597804169063762, 1.4814432639008572, NA, NA, NA,  
1.0710836533001502, -1.620540299671808, NA, NA, NA, 2.6365919372928532, NA, NA, NA, NA,  
4.92264274583511, NA, NA, NA, NA, -1.6299898817437555, 1.0871294939763763, NA, NA, NA,  
1.2676217340883333, -8.118730539147482, NA, NA, NA, -3.154489448916247, NA, NA, NA, NA,  
-2.3356097104753624, -2.604732152171071, -3.5261879150227347, NA, NA,  
1.8815091031685816, NA, NA, NA, NA, 2.4885225162490814, NA, NA, NA), .Dim = c(51, 5)),  
sd.d = 2.5355283399811857  
)
```

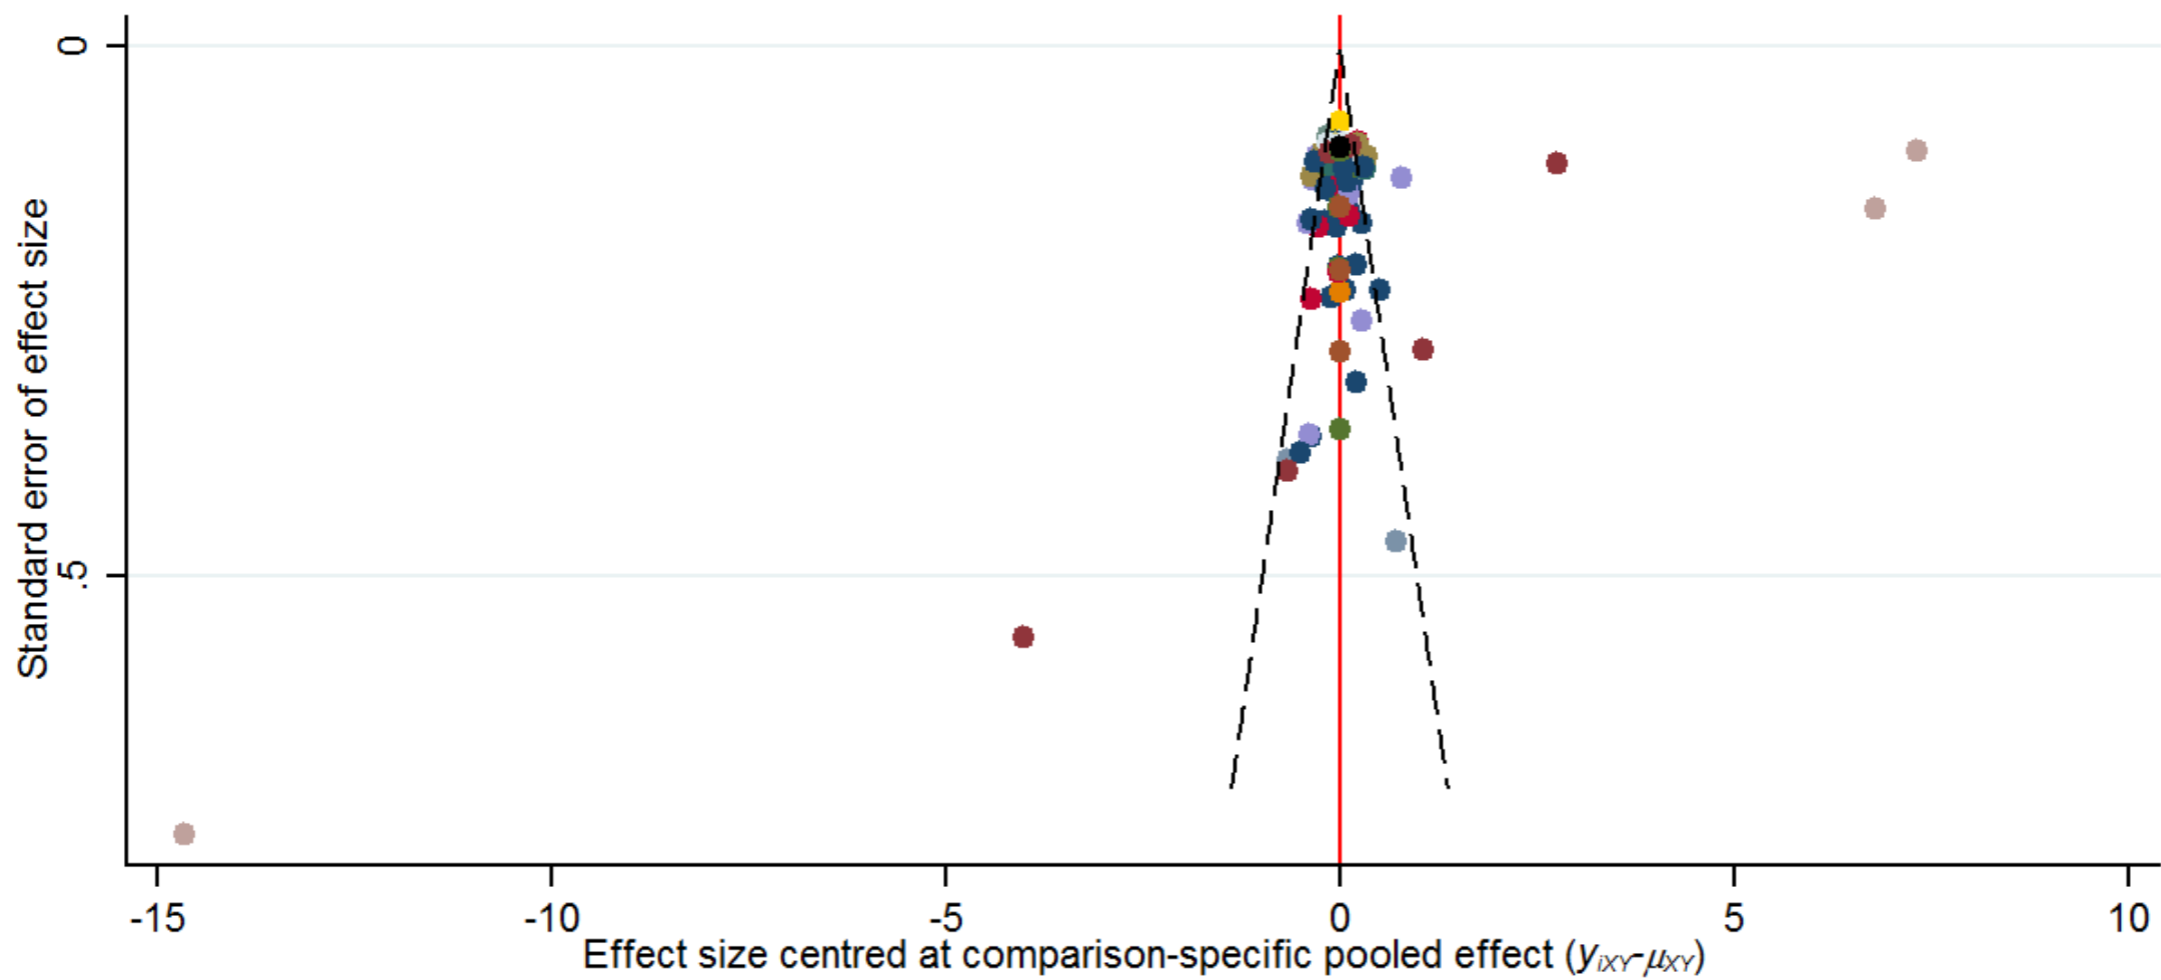

|                    |                  |                        |                      |                      |                   |
|--------------------|------------------|------------------------|----------------------|----------------------|-------------------|
| EX10BID vs Placebo | EX10BID vs SU    | EX10BID vs Sitagliptin | EX10BID vs TZD       | EX10BID vs EX2QW     | EX10BID vs EX5BID |
| EX10BID vs Insulin | EX10BID vs LIR18 | EX10BID vs Met         | EX2QW vs Placebo     | EX2QW vs Sitagliptin | EX2QW vs TZD      |
| EX2QW vs Insulin   | EX2QW vs LIR18   | EX2QW vs Met           | EX5BID vs Placebo    | Insulin vs LIR18     | LIR06 vs Placebo  |
| LIR06 vs SU        | LIR06 vs TZD     | LIR06 vs LIR09         | LIR06 vs LIR12       | LIR06 vs LIR18       | LIR09 vs Placebo  |
| LIR09 vs SU        | LIR12 vs Placebo | LIR12 vs SU            | LIR12 vs Sitagliptin | LIR12 vs TZD         | LIR12 vs LIR18    |
| LIR18 vs Placebo   | LIR18 vs SU      | LIR18 vs Sitagliptin   | LIR18 vs TZD         |                      |                   |

|                                      |                                      |                                      |                                   |                                      |                       |                                      |                                      |                                      |                                   |                                      |                                   |                |
|--------------------------------------|--------------------------------------|--------------------------------------|-----------------------------------|--------------------------------------|-----------------------|--------------------------------------|--------------------------------------|--------------------------------------|-----------------------------------|--------------------------------------|-----------------------------------|----------------|
| <b>EX10BID</b>                       |                                      |                                      |                                   |                                      |                       |                                      |                                      |                                      |                                   |                                      |                                   |                |
| -1.14<br>(-2.34,0.04)                | <b>EX2QW</b>                         |                                      |                                   |                                      |                       |                                      |                                      |                                      |                                   |                                      |                                   |                |
| -1.02<br>(-2.21,0.20)                | 0.15<br>(-1.53,1.77)                 | <b>Exe5ug</b>                        |                                   |                                      |                       |                                      |                                      |                                      |                                   |                                      |                                   |                |
| <b>-4.68</b><br><b>(-5.66,-3.68)</b> | <b>-3.52</b><br><b>(-4.74,-2.29)</b> | <b>-3.67</b><br><b>(-5.18,-2.13)</b> | <b>Insulin</b>                    |                                      |                       |                                      |                                      |                                      |                                   |                                      |                                   |                |
| <b>-2.64</b><br><b>(-4.38,-0.88)</b> | -1.48<br>(-3.46,0.40)                | -1.63<br>(-3.70,0.39)                | <b>2.04</b><br><b>(0.09,3.93)</b> | <b>LIR0.6</b>                        |                       |                                      |                                      |                                      |                                   |                                      |                                   |                |
| -3.13<br>(-6.71,0.46)                | -1.99<br>(-5.75,1.77)                | -2.10<br>(-5.88,1.60)                | 1.55<br>(-2.13,5.24)              | -0.51<br>(-4.19,3.26)                | <b>LIR0.9</b>         |                                      |                                      |                                      |                                   |                                      |                                   |                |
| <b>-1.82</b><br><b>(-3.17,-0.44)</b> | -0.67<br>(-2.26,0.87)                | -0.81<br>(-2.51,0.95)                | <b>2.86</b><br><b>(1.29,4.40)</b> | 0.82<br>(-0.95,2.60)                 | 1.30<br>(-2.42,4.97)  | <b>LIR1.2</b>                        |                                      |                                      |                                   |                                      |                                   |                |
| -0.99<br>(-2.13,0.13)                | 0.16<br>(-1.20,1.49)                 | 0.02<br>(-1.54,1.55)                 | <b>3.69</b><br><b>(2.35,5.00)</b> | 1.65<br>(-0.04,3.37)                 | 2.14<br>(-1.50,5.77)  | 0.83<br>(-0.41,2.06)                 | <b>LIR1.8</b>                        |                                      |                                   |                                      |                                   |                |
| -1.61<br>(-3.59,0.39)                | -0.45<br>(-2.59,1.61)                | -0.60<br>(-2.89,1.74)                | <b>3.06</b><br><b>(0.91,5.19)</b> | 1.02<br>(-1.45,3.57)                 | 1.52<br>(-2.52,5.48)  | 0.21<br>(-2.08,2.45)                 | -0.62<br>(-2.75,1.53)                | <b>Met</b>                           |                                   |                                      |                                   |                |
| <b>-6.08</b><br><b>(-7.35,-4.80)</b> | <b>-4.94</b><br><b>(-6.54,-3.32)</b> | <b>-5.07</b><br><b>(-6.74,-3.36)</b> | -1.41<br>(-2.92,0.14)             | <b>-3.44</b><br><b>(-5.26,-1.56)</b> | -2.95<br>(-6.52,0.56) | <b>-4.27</b><br><b>(-5.78,-2.70)</b> | <b>-5.11</b><br><b>(-6.47,-3.67)</b> | <b>-4.48</b><br><b>(-6.71,-2.17)</b> | <b>SU</b>                         |                                      |                                   |                |
| <b>-2.68</b><br><b>(-4.39,-0.95)</b> | -1.52<br>(-3.23,0.15)                | -1.67<br>(-3.69,0.38)                | <b>1.99</b><br><b>(0.15,3.86)</b> | -0.03<br>(-2.25,2.18)                | 0.46<br>(-3.42,4.33)  | -0.86<br>(-2.65,0.96)                | -1.68<br>(-3.40,0.02)                | -1.05<br>(-3.27,1.17)                | <b>3.40</b><br><b>(1.45,5.38)</b> | <b>Sitagliptin</b>                   |                                   |                |
| <b>-4.88</b><br><b>(-6.61,-3.19)</b> | <b>-3.75</b><br><b>(-5.38,-2.08)</b> | <b>-3.89</b><br><b>(-5.91,-1.84)</b> | -0.22<br>(-2.00,1.63)             | <b>-2.25</b><br><b>(-4.30,-0.15)</b> | -1.76<br>(-5.64,2.06) | <b>-3.07</b><br><b>(-4.89,-1.27)</b> | <b>-3.90</b><br><b>(-5.60,-2.20)</b> | <b>-3.28</b><br><b>(-5.45,-1.00)</b> | 1.20<br>(-0.74,3.13)              | <b>-2.21</b><br><b>(-4.01,-0.41)</b> | <b>TZD</b>                        |                |
| <b>-2.07</b><br><b>(-2.93,-1.25)</b> | -0.93<br>(-2.30,0.42)                | -1.07<br>(-2.26,0.14)                | <b>2.60</b><br><b>(1.39,3.80)</b> | 0.56<br>(-1.15,2.28)                 | 1.06<br>(-2.56,4.68)  | -0.25<br>(-1.62,1.06)                | -1.10<br>(-2.20,0.05)                | -0.46<br>(-2.52,1.61)                | <b>4.01</b><br><b>(2.58,5.32)</b> | 0.60<br>(-1.16,2.36)                 | <b>2.81</b><br><b>(1.09,4.53)</b> | <b>Placebo</b> |

**Appendix Figure. Network meta-analysis result of 13 treatments at least 24w among 37 RCTs.**

Treatments are reported in alphabetical order. For upper triangle, comparisons between treatments should be read from top to left and the estimate is in the cell in common between the column-defining treatment and the row-defining treatment. EX5BID: exenatide 5µgtwicedaily; EX10BID: exenatide 10µgtwicedaily; EX2QW: exenatide 2mg once weekly; LIR0.6: liraglutide 0.6 mg oncedaily; LIR0.9: liraglutide 0.9 mg oncedaily; LIR1.2: liraglutide 1.2 mg oncedaily; LIR1.8: liraglutide 1.8 mg oncedaily; SU: sulphonylureas; TZD: thiazolidinedione; MET: metformin.
